# Supplementary material
Source: MDPI journal article supplement (https://www.mdpi.com/2227-9040/8/4/100)
Supplement: s1 [file s1]

Supplementary Material

# Sensitive Electrochemical Detection of Tryptophan Using a Hemin/G-Quadruplex Aptasensor

Ayemeh Bagheri Hashkavayi <sup>1</sup>, Jahan Bakhsh Raoof <sup>2</sup> and Ki Soo Park <sup>1,\*</sup>

<sup>1</sup> Department of Biological Engineering, College of Engineering, Konkuk University, Seoul 05029, Korea; elnazbagheri@konkuk.ac.kr

<sup>2</sup> Electroanalytical Chemistry Research Laboratory, Department of Analytical Chemistry, Faculty of Chemistry, University of Mazandaran, Babolsar 47416-95447, Iran; j.raoof@umz.ac.ir

\* Correspondence: akdong486@konkuk.ac.kr

Received: 13 September 2020; Accepted: 12 October 2020; Published: date

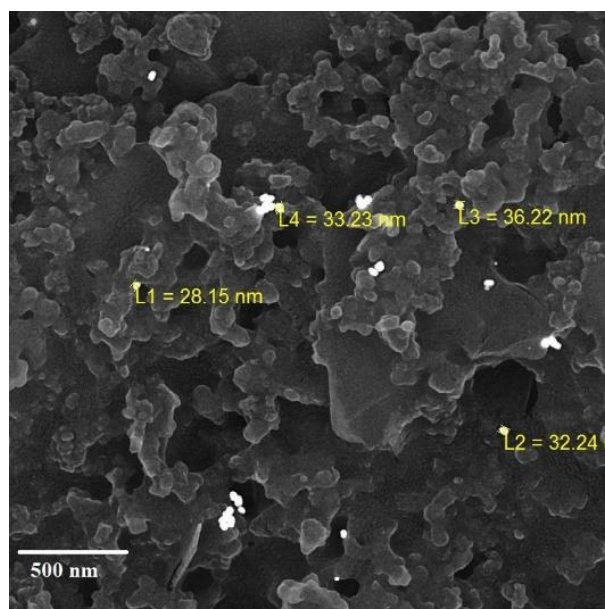

**Figure S1.** FE-SEM images of AuNPs/SPE. The measured particle size is indicated in yellow color. The scale bar is 500 nm.

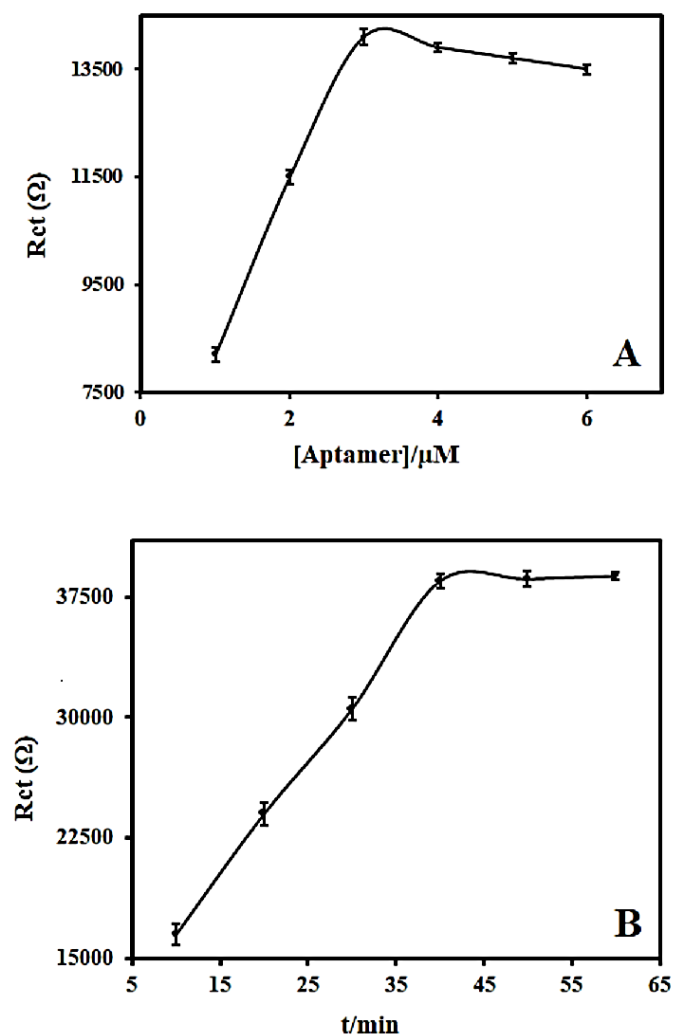

**Figure S2.** Optimization of the prepared aptasensor (Apt/DGNs/Fe<sub>3</sub>O<sub>4</sub>@SiO<sub>2</sub>/DABCO/SPE). (A) Optimization of aptamer concentration for preparation of aptasensor: 1  $\mu$ M (a), 2  $\mu$ M (b), 3  $\mu$ M (c), 4  $\mu$ M (d), 5  $\mu$ M (e), and 6  $\mu$ M (f). (B) Optimization of incubation time for the interaction of aptamer (3  $\mu$ M) with Trp (0.9 nM).

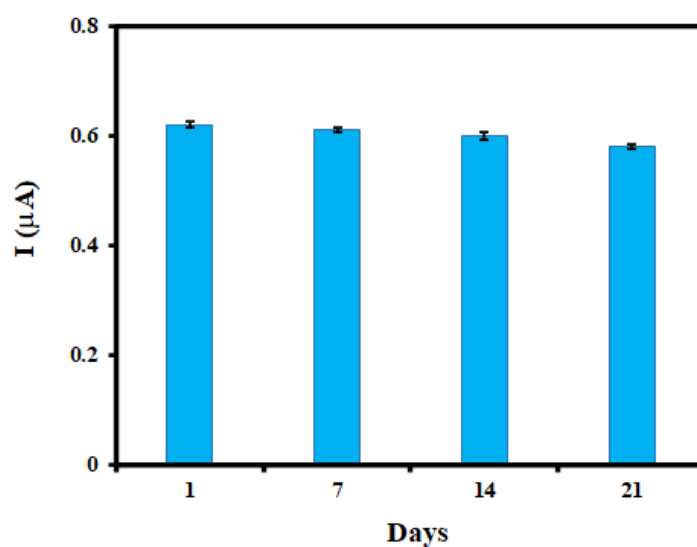

**Figure S3.** Stability of the prepared aptasensor.

**Table S1.** Analysis of Trp aptamer sequence by QGRS Mapper software.

| <b>Length</b> | <b>Quadruplex forming G-rich sequences (QGRS)</b> | <b>G-Score*</b> |
|---------------|---------------------------------------------------|-----------------|
| 17            | GGTTAGGTCAGGTTTGG                                 | 21              |

\* The G-score provided by QGRS Mapper is a criterion to forecast how likely QGRS is to form a stable quadruplex structure. It is known that G-quadruplexes with G scores  $\geq 19$  has a P-value of lower than 0.05, and thus 19 is used as the threshold to identify significant G-quadruplexes.

**Table S2.** Analysis of human serum samples with Trp at different concentrations.

| <b>Sample</b> | <b>Added (nM)</b> | <b>Detected (nM)</b> | <b>CV (%)* (n = 3)</b> | <b>Accuracy (%)</b> |
|---------------|-------------------|----------------------|------------------------|---------------------|
| 1             | 0.04              | 0.036                | 1.6                    | 10                  |
| 2             | 7                 | 6.93                 | 1.2                    | 1                   |
| 3             | 100               | 105                  | 0.9                    | 5                   |

\*CV (coefficient of variation).
